# Supplementary material for: In situ topotactic formation of an inorganic intergrowth bulk NiS/FeS@MgFe-LDH heterojunction to simulate CODH for the photocatalytic reduction of CO2
Source: Royal Society of Chemistry journal article supplement (doi:10.1039/d3nr06581b), 2024-01-01
Supplement: d3nr06581b1.pdf [file d3nr06581b1.pdf]

## Supporting information

# ***In-situ* topotactic formation of the inorganic intergrowth bulk heterojunction NiS/FeS@MgFe-LDHs to simulate the carbon monoxide dehydrogenase for photocatalytic reduction CO<sub>2</sub>**

Yuexian Li<sup>a</sup>, Wenli Su<sup>c</sup>, Xiaoyan Wang<sup>a</sup>, Jun Lu<sup>\*a,b</sup>, Wenkai Zhang<sup>\*c</sup>, Shuo Wei<sup>\*d</sup>

<sup>a</sup>State Key Laboratory of Chemical Resource Engineering and College of Chemistry, Beijing University of Chemical Technology, P. Box 98, Beisanhuan East Road 15, Beijing 100029, P. R. China.

<sup>b</sup>Beijing Advanced Innovation Center for Soft Matter Science and Engineering, Beijing University of Chemical Technology, P. Box 98, Beisanhuan East Road 15, Beijing 100029, P. R. China.

<sup>c</sup>Department of Physics and Applied Optics Beijing Area Major Laboratory, Center for Advanced Quantum Studies, Beijing Normal University, Xijiekou Outside Street 19, Beijing 100875, China

<sup>d</sup>College of Chemistry, Beijing Normal University, Xijiekou Outside Street 19, Beijing 100875, P. R. China

\*E-mail (J. Lu): [lujun@mail.buct.edu.cn](mailto:lujun@mail.buct.edu.cn) \*E-mail (W.K. Zhang): [wkzhang@bnu.edu.cn](mailto:wkzhang@bnu.edu.cn) \*E-mail (S. Wei): [vshuo@bnu.edu.cn](mailto:vshuo@bnu.edu.cn)

### 1. Characterization

### 2. Table and Fig.

**Table S1.** Local structure parameters around Fe estimated by EXAFS analysis.

**Table S2.** Local structure parameters around Ni estimated by EXAFS analysis.

**Table S3.** Photocatalytic test results for the systems irradiated by UV-vis light for 5 h.

**Table S4.** The photocatalytic performance comparison of CO<sub>2</sub> reduction over various catalysts.

**Fig. S1.** The XRD of (A) the different molar ratios of NiMgFe-LDHs precursors to vulcanize. (B) NiMgFe-MMO at different vulcanizing time.

**Fig. S2.** The SEM images of NiMgFe-MMO at different vulcanizing time (A) 1h; (B) 3h; (C) 5h; (D) 7h; (E) 9h; (F) 12h; (G) 24h; (H) 36h.

**Fig. S3.** The scanning electron microscope (SEM) images of catalysts (A) NiMgFe-LDHs; (B) NiMgFe-MMO; (C) NiS/FeS@MgFe-LDHs.

**Fig. S4.** K-edge of XAS for (A) Fe, (B) Ni. The oscillation function  $k^3\chi(k)$  of the K-edge in XAS for (C) Fe, (D) Ni. The magnitude of  $k^3$ -weighted FT and corresponding fitting of K-edge for (E) Fe, (F) Ni.

**Fig. S5.** (A-C) The UV-vis diffuse reflectance spectra were fitted with Kubelka-Munk formula and Tauc's plot to estimate the band gap. Mott-Schottky plot of the (D) NiMgFe-LDHs, (E) FeS, (F) NiS. (G) Schematic diagram of the location of the energy bands. (H-I) The EIS of the NiMgFe-LDHs, NiMgFe-MMO, FeS, NiS, and NiS/FeS@MgFe-LDHs in light and dark.

**Fig. S6.** (E) The photoluminescence spectra of all catalysts with 320 nm excitation. (F) TRPL spectra of NiMgFe-LDHs and IIBH NiS/FeS@MgFe-LDHs with 343 nm excitation and 470 nm emission.

**Fig. S7.** GC standard curve for the quantitative determination of pure (A) CO and (B) CH<sub>4</sub> by external standard method. (C) The isotope experiments of photocatalytic CO<sub>2</sub> methanation with <sup>13</sup>CO<sub>2</sub>.

**Fig. S8.** (A) Photocatalytic blank and control experiments. (B) Photocatalytic experiments with catalysts obtained at different vulcanisation times. (C) The *in-situ* FTIR of the NiMgFe-LDHs.

**Fig. S9.** The XRD pattern of the IIBH NiS/FeS@MgFe-LDHs underwent the photocatalytic reduction CO<sub>2</sub>.

**Fig. S10.** The XPS spectra of NiMgFe-LDHs, NiMgFe-MMO, and of NiS/FeS@MgFe-LDHs (A) Fe 2p; (B) Ni 2p; (C) S 2p; (D) O 1s. (E) S 2p of NiS/FeS@MgFe-LDHs, FeS and NiS. The ISI-XPS of (F) FeS; (G) NiS; (H) Mg 1s of NiS/FeS@MgFe-LDHs; (I) S 2p of NiS/FeS@MgFe-LDHs.

**Fig. S11.** The TAS spectra of (A) NiMgFe-LDHs; (B) FeS; (C) NiS+FeS mixture in CH<sub>3</sub>OH at 350nm excitation.

## 1. Characterization.

Powder X-ray diffraction (XRD) using Cu K radiation ( $\lambda = 0.154$  nm, 40 kV, and 40 mA) on the Rigaku Ultima III diffractometer was used to explore crystal structure identification. The scan speed was  $10^\circ \text{ min}^{-1}$ , and the 2theta range was  $5^\circ$  to  $70^\circ$ . Transmission electron microscopy (TEM, JEM-3010) and scanning electron microscopy (SEM, Zeiss) were used for analyzing the morphology of the photocatalysts. Using a Hitachi U-3900H spectrophotometer and white BaSO<sub>4</sub> as the reflection standard, UV-Visible diffuse reflectometry (UV-DRS) was used to examine the photocatalyst's light absorption characteristics. The functional group of the materials was identified using the Fourier transform infrared spectrometer (FT-IR, TENSOR II). Utilizing a Thermo Fisher Scientific ESCALAB 250, X-ray photoelectron spectroscopy (XPS) examination was carried out, and Al K $\alpha$  = 1486 eV radiation was employed to investigate the surface composition and chemical valence states. Similar circumstances were used for *in-situ* irradiation XPS measurements, however UV-visible light irradiation was added. The HITACHIF-4600 fluorescence spectrophotometer was used to examine the PL spectra of each sample. The femtosecond transient absorption spectra (fs-TAS) were recorded using Helios equipment, and the nondegenerate pump-probe system was utilized to look at the dynamics of transients from 0.5 picoseconds to 200 picoseconds. The 350 nm-pump pulses (5 mW on average at the tested samples) were created by the O PerA Solo optical parametric amplifier (Coherent Libra, 800 nm, 50 fs, 4 mJ), and they were pumped by an LBO laser (Coherent Evolution-50C, 1 kHz system). A mode-locked Ti-sapphire oscillator (Coherent Vitesse, 80 MHz) was used to seed the amplifier. The white light continuum from 475 nm to 850 nm was created by forcing the 800 nm-femtosecond pulses through a constantly rotating CaF<sub>2</sub> crystal. The Beijing Synchrotron Radiation Facility (BSRF) used the 1W1B beamline and a double crystal Si (111) monochromator to produce X-ray absorption fine structure (XAFS) investigations.

**Electrochemical testing.** The electrochemical workstation (CHI660E) with a three-electrode setup and a spinning ring disk was used for the electrochemical impedance spectroscopy (EIS) testing. The electrolyte was pH = 6.8, 0.1 M Na<sub>2</sub>SO<sub>4</sub> aqueous solution. The reference electrode and counter electrode were Hg/Hg<sub>2</sub>Cl<sub>2</sub> and graphite electrode, respectively. In 485  $\mu\text{L}$  of deionized water and 485  $\mu\text{L}$  of ethanol, 10 mg of various catalyst samples were scattered with 30  $\mu\text{L}$  of nafion as adhesive. The samples were uniformly deposited on a glassy carbon

electrode after an ultrasonic dispersion period of 10 min. Without applying bias voltage, the photocurrent response was utilized to measure the current produced by the sample in either bright or dark conditions. Using the Mott-Schottky plot, the flat band potential ( $V_{fb}$ ) in the semiconductor space charge area was computed.

**Photocatalytic reduction of CO<sub>2</sub> experiment.** In a 100 mL quartz photocatalytic reaction cell, 30 mg of photocatalysts were dissolved in 35 mL of deionized water using an ultrasonic dispersion technique for 10 minutes. The reaction cell was then cycled with CO<sub>2</sub> pure gas for 30 minutes. In order to reduce CO<sub>2</sub> and keep the entire photocatalytic system at room temperature, a 300 mW/cm<sup>2</sup> xenon lamp was employed. Gas chromatography (GC-7920, TDX-01 packed column) with a flame ionization detector (FID) as N<sub>2</sub> carrier gas was used to monitor the gas products. For each catalyst, at least three parallel tests were conducted to guarantee the correctness of the photocatalytic test data.

**In-situ fourier transform infrared spectroscopy on CO<sub>2</sub> reaction experiment.** The BaF<sub>2</sub> window and MCT detector were installed in the Nicolet 6700 *in-situ* fourier transform infrared spectrometer. The device has a measuring range of 4000 to 400 cm<sup>-1</sup>. The measuring mode employed was diffuse reflection. First, CO<sub>2</sub> and H<sub>2</sub>O that had been adsorbed on the catalyst's surface were removed using high-pure He. The *in-situ* spectroscopic cell was filled with the photocatalyst, He gas was continually added, and the temperature was controlled to rise from ambient temperature to 100 °C at a rate of 10 °C/minute for 40 min. At room temperature, blank background data was gathered before high-purity CO<sub>2</sub> and water vapor were bubbled into the *in-situ* spectroscopic cell. CO<sub>2</sub> gas flowed at a rate of 10 ml/min. To produce the spectra of the CO<sub>2</sub> reaction after the various illumination times, the spectra were taken at intervals of 2 min and exposed to radiation for 30 min. Condensing the flowing water and maintaining room temperature in the *in-situ* spectroscopic cell allowed the entire reaction to be carried out.

**Table S1.** Local structure parameters around Fe estimated by EXAFS analysis.

| Sample            | Shell                 | S <sub>0</sub> <sup>2</sup> N <sup>[a]</sup> | R[Å] <sup>[b]</sup> | σ <sup>2</sup> [10 <sup>-3</sup> Å <sup>2</sup> ] <sup>[c]</sup> | ΔE <sub>0</sub> | R-factor (10 <sup>-3</sup> ) |
|-------------------|-----------------------|----------------------------------------------|---------------------|------------------------------------------------------------------|-----------------|------------------------------|
| NiMgFe-LDHs       | Fe-O                  | 6.0                                          | 1.42 ± 0.01         | 5.31                                                             | 0.3             | 10.01                        |
|                   | Fe-O-M <sup>[d]</sup> | 6.0                                          | 2.46 ± 0.01         | 4.73                                                             | 0.2             |                              |
| NiMgFe-MMO        | Fe-O                  | 5.99                                         | 1.41 ± 0.01         | 5.22                                                             | -1.5            | 11.35                        |
|                   | Fe-O-M                | 5.97                                         | 2.44 ± 0.01         | 5.12                                                             | -0.1            |                              |
| NiS/FeS@MgFe-LDHs | Fe-S                  | 6.0                                          | 1.49 ± 0.01         | 6.91                                                             | 0.5             | 11.69                        |
|                   | Fe-O-M                | 5.99                                         | 2.46 ± 0.01         | 4.37                                                             | 1.3             |                              |
|                   | Fe-S-M                | 5.81                                         | 3.01 ± 0.01         | 5.02                                                             | 1.1             |                              |

[a] N: coordination number; [b] R: distance between adsorber and backscatter atoms; [c] σ<sup>2</sup>: Debye-Waller factor; [d] M: Fe or Ni.

We know that the basic single scattering formula of EXAFS can be written in the following form: <sup>1</sup>

$$\chi(k) = \sum_j N_j S_0^2 F_j(k) \cdot \frac{1}{kR_j^2} \cdot e^{-2\sigma_j^2 k^2} \cdot e^{-2R_j/\lambda(k)} \cdot \sin[2kR_j + \phi_j^l(k)]$$

Among them, the physical quantity  $N_j$  and  $R_j$  has been discussed above, and the Debye-Waller factor  $\sigma^2$  is also worth paying attention to, which is related to the disorder in the system. The so-called disorder is the

scattering atom position deviates from  $R_j$ , and this deviation will cause the absorption peak to broaden,<sup>2</sup> which included thermal disorder caused by thermal vibration and structural disorder brought by structural distortion ( $\sigma^2 = \sigma_T^2 + \sigma_S^2$ ).<sup>1</sup> Under the same test conditions of temperature, the variation of  $\sigma^2$  might partially account for the the disorder of crystal structure in atomic size.

**Table S2.** Local structure parameters around Ni estimated by EXAFS analysis.

| Sample            | Shell                 | N <sup>[a]</sup> | R[Å] <sup>[b]</sup> | $\sigma^2[10^{-3}\text{Å}^2]$ <sup>[c]</sup> | $\Delta E_0$ | R-factor (10 <sup>-3</sup> ) |
|-------------------|-----------------------|------------------|---------------------|----------------------------------------------|--------------|------------------------------|
| NiMgFe-LDHs       | Ni-O                  | 6.0              | 1.58 ± 0.01         | 5.21                                         | -0.6         | 10.05                        |
|                   | Ni-O-M <sup>[d]</sup> | 6.0              | 2.63 ± 0.01         | 6.37                                         | 1.1          |                              |
| NiMgFe-MMO        | Ni-O                  | 5.9              | 1.56 ± 0.01         | 5.58                                         | -1.3         | 10.79                        |
|                   | Ni-O-Ni               | 5.7              | 2.51 ± 0.01         | 6.70                                         | 1.7          |                              |
| NiS/FeS@MgFe-LDHs | Ni-S                  | 5.3              | 1.61 ± 0.01         | 6.35                                         | -0.1         | 8.57                         |
|                   | Ni-S-M                | 5.1              | 2.47 ± 0.01         | 5.41                                         | 1.3          |                              |

[a] N: coordination number; [b] R: distance between adsorber and backscatter atoms; [c]  $\sigma^2$ : Debye-Waller factor; [d] M: Ni or Fe.

**Table S3.** Photocatalytic test results for the systems irradiated by UV-vis light for 5 h.

| photocatalyst     | The yields of CO (μmol/g·h) | The yields of CH <sub>4</sub> (μmol/g·h) | TCEN <sup>[a]</sup> (μmol/mg) | Activity improvement rate <sup>[b]</sup> (%) | Apparent quantum yield <sup>[c]</sup> (AQY, %) | CO Selectivity <sup>[d]</sup> |
|-------------------|-----------------------------|------------------------------------------|-------------------------------|----------------------------------------------|------------------------------------------------|-------------------------------|
|                   |                             |                                          |                               |                                              |                                                | S (%)                         |
| NiMgFe-LDHs       | 54.0189                     | 5.4077                                   | 4.2433                        | 0                                            | 1.8715                                         | 71.4%                         |
| NiMgFe-MMO        | 221.6183                    | 22.663                                   | 20.8180                       | 45.9167                                      | 5.0871                                         | 70.9%                         |
| NiS/FeS@MgFe-LDHs | 2151.974                    | 108.563                                  | 199.0817                      | -                                            | 14.7146                                        | 83.2%                         |
| Pure NiS          | 24.1119                     | 2.1378                                   | 2.1775                        | -                                            | 0.0734                                         | 73.8%                         |
| Pure FeS          | 20.0218                     | 2.6123                                   | 2.0314                        | 0.8668                                       | 0.1379                                         | 65.7%                         |
| NiS + FeS mixture | 60.6731                     | 14.537                                   | 7.9214                        | 3.9061                                       | 1.3602                                         | 51.1%                         |

The photoreduction CO<sub>2</sub> results can be calculation by equation below:

$$[a] \text{TCEN} = \frac{\sum (n_{\text{production}} \times n_{\text{electrons}})}{m_{\text{cat}}}$$

TCEN was represented the total number of electrons actually consumed in photocatalytic CO<sub>2</sub> reduction,  $n_{\text{production}}$  and  $n_{\text{electrons}}$  were the yields of actual product of CO<sub>2</sub> reduction and the moles of electrons reacted to form a mole product (CO:  $n_{\text{electrons}} = 2$ ; CH<sub>4</sub>:  $n_{\text{electrons}} = 8$ ), respectively.

The  $n_{\text{(CH}_4\text{)}}$  and  $n_{\text{(CO)}}$  represented the yields of CH<sub>4</sub> and CO.

$$[b] \text{Activity improvement rate (\%)} = \frac{\text{TCEN}_{(\text{catalysts})} - \text{TCEN}_{(\text{CuNiAl-LDH})}}{\text{TCEN}_{(\text{CuNiAl-LDH})}} \times 100\%$$

$$[c] \text{AQY} = \frac{\text{CH}_4 \text{ yields } (\mu\text{mol/s}) \times 8 + \text{CO yields } (\mu\text{mol/s}) \times 2}{\text{Photon flux } (\mu\text{mol/s})} \times 100\%$$

where, both, yields of products and photon intensity are in  $\mu\text{mol}$ . Photon intensity can be calculated as follow:<sup>3</sup>

$$\text{Photon flux } (\mu\text{mol/s}) = \frac{\text{Intensity of light} \times \text{Wavelength}}{\text{Planck constant} \times \text{Photon density}} \times \frac{\text{Incident area}}{\text{Avogadro's constant}}$$

The intensity of the lamp is represented in  $\text{Wm}^{-2}$ , the light wavelength is in meters (m) and the reactor incident area is calculated in  $\text{m}^2$ . Planck's constant, Photondensity, and Avogadro's number are with values  $6.63 \times 10^{-34} \text{ J}\cdot\text{s}$ ,  $3 \times 10^8 \text{ m}\cdot\text{s}^{-1}$ , and  $6.63 \times 10^{23} \text{ mol}^{-1}$ , respectively.

$$S = \frac{\text{CO yields } (\mu\text{mol/gh}) \times 2}{\text{CO yields } (\mu\text{mol/gh}) \times 2 + \text{CH}_4 \text{ yields } (\mu\text{mol/gh})} \times 100\%$$

**Table S4.** The photocatalytic performance comparison of  $\text{CO}_2$  reduction over various catalysts.

| photocatalyst                                       | mass | Energy source                                      | Hydrogen source      | CO production                                        | $\text{CH}_4$ production                            | Ref.      |
|-----------------------------------------------------|------|----------------------------------------------------|----------------------|------------------------------------------------------|-----------------------------------------------------|-----------|
| NiS/FeS@MgFe-LDHs                                   | 30mg | Xenon lamp of 300 $\text{mW}\cdot\text{cm}^{-2}$   | $\text{H}_2\text{O}$ | 2151.974 $\mu\text{mol/g}_{\text{cat}}\cdot\text{h}$ | 108.563 $\mu\text{mol/g}_{\text{cat}}\cdot\text{h}$ | This work |
| $\text{FeNi}_2\text{S}_4$                           | 30mg | electroreduction<br>-0.8 V                         | $\text{H}_2\text{O}$ | -                                                    | -                                                   | 4         |
| CODH/AgNCs-PMAA                                     | 5mg  | 300 W arc lamp<br>with 420 nm filter               | $\text{H}_2\text{O}$ | 11.36 $\mu\text{mol/g}_{\text{cat}}\cdot\text{h}$    | -                                                   | 5         |
| Ni-2,6-bis[(2-pyridinylmethyl)thio]methyl pyridine) | 30mg | 300 W Xenon lamp<br>( $\lambda > 420 \text{ nm}$ ) | $\text{H}_2\text{O}$ | 25 $\mu\text{mol/g}_{\text{cat}}\cdot\text{h}$       | -                                                   | 6         |
| poly(2-(dimethylamino)ethyl methacrylate)           | 0.1g | 300 W Xenon lamp<br>( $\lambda > 420 \text{ nm}$ ) | $\text{H}_2\text{O}$ | 2.2 $\mu\text{mol/g}_{\text{cat}}\cdot\text{h}$      | -                                                   | 7         |
| CODH-DIH                                            | 30mg | 300 W Xenon lamp                                   | $\text{H}_2\text{O}$ | 1.77 $\mu\text{mol/g}_{\text{cat}}\cdot\text{h}$     | -                                                   | 8         |
| $\text{TiO}_2$ -CODH                                | 50mg | 300 W Xenon lamp<br>( $\lambda > 420 \text{ nm}$ ) | $\text{H}_2\text{O}$ | 250 $\mu\text{mol/g}_{\text{cat}}\cdot\text{h}$      | 11.8 $\mu\text{mol/g}_{\text{cat}}\cdot\text{h}$    | 9         |

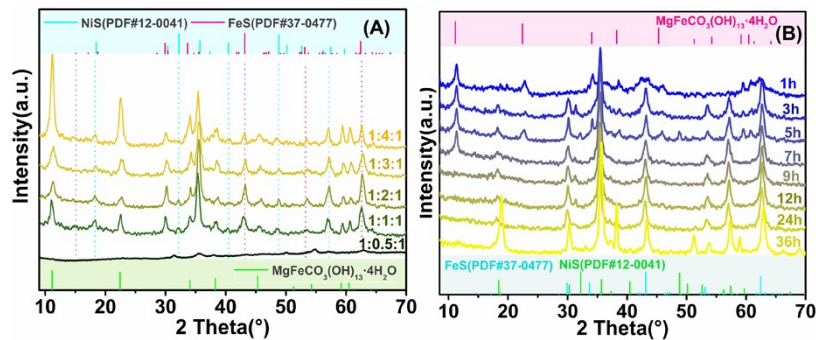

**Fig. S1.** The XRD of (A) the different molar ratios of NiMgFe-LDHs precursors to vulcanize. (B) NiMgFe-MMO at different vulcanizing time.

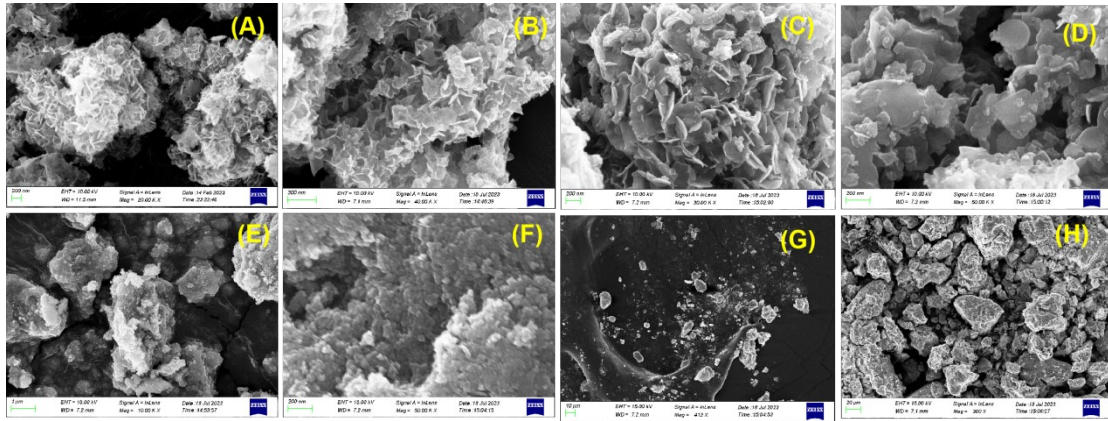

**Fig. S2.** The SEM images of NiMgFe-MMO at different vulcanizing time (A) 1h; (B) 3h; (C) 5h; (D) 7h; (E) 9h; (F) 12h; (G) 24h; (H) 36h.

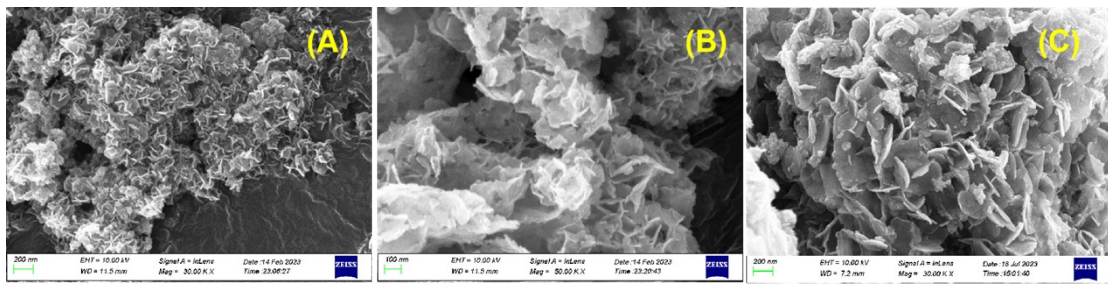

**Fig. S3.** The scanning electron microscope (SEM) images of catalysts (A) NiMgFe-LDHs; (B) NiMgFe-MMO; (C) NiS/FeS@MgFe-LDHs.

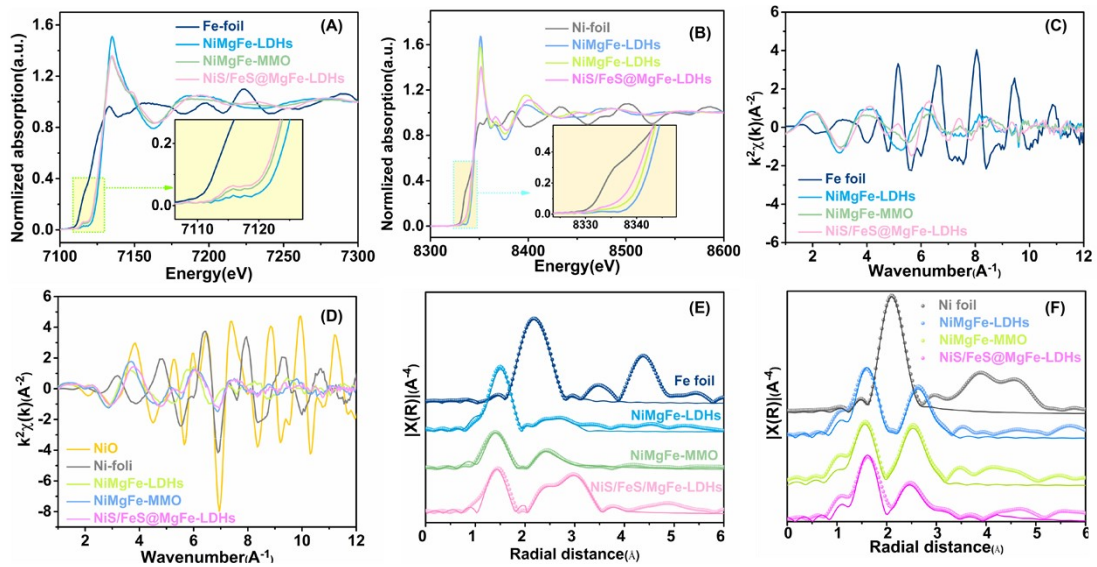

**Fig. S4.** K-edge of XAS for (A) Fe, (B) Ni. The oscillation function  $k^3\chi(k)$  of the K-edge in XAS for (C) Fe, (D) Ni. The magnitude of  $k^3$ -weighted FT and corresponding fitting of K-edge for (E) Fe, (F) Ni.

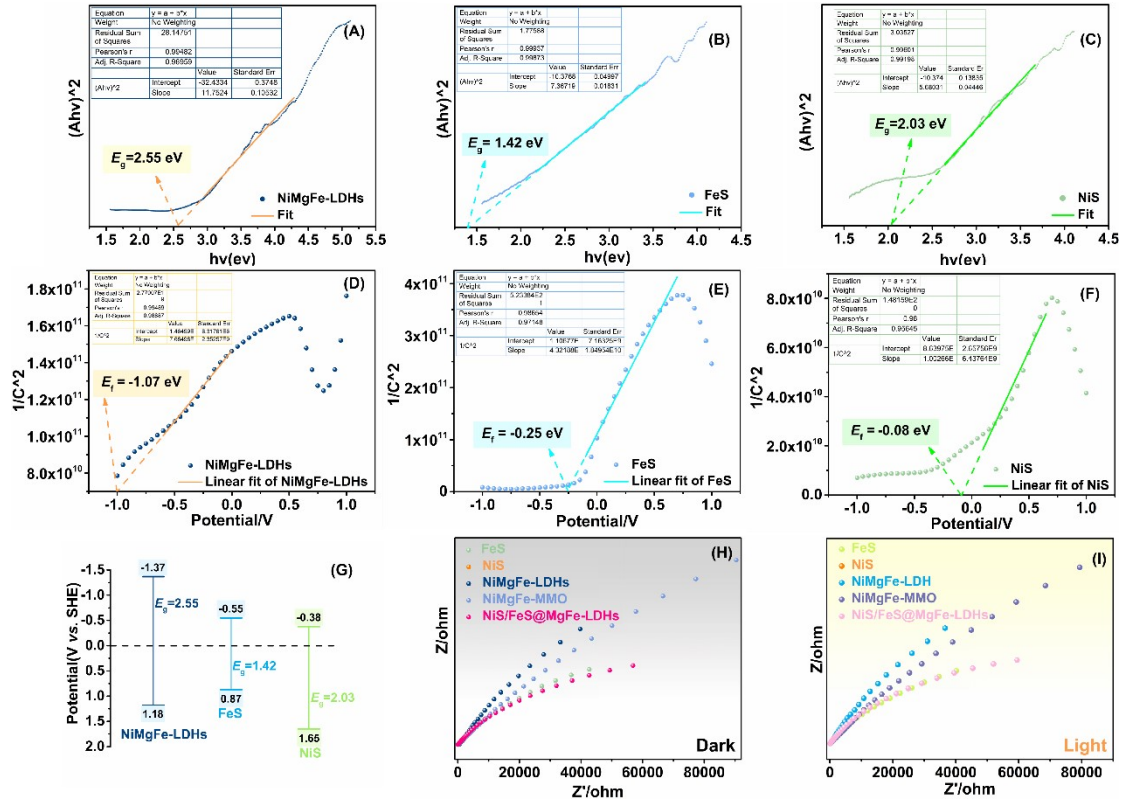

**Fig. S5.** (A-C) The UV-vis diffuse reflectance spectra were fitted with Kubelka-Munk formula and Tauc's plot to estimate the band gap. Mott-Schottky plot of the (D) NiMgFe-LDHs, (E) FeS, (F) NiS. (G) Schematic diagram of the location of the energy bands. (H-I) The EIS of the NiMgFe-LDHs, NiMgFe-MMO, FeS, NiS, and NiS/FeS@MgFe-LDHs in light and dark.

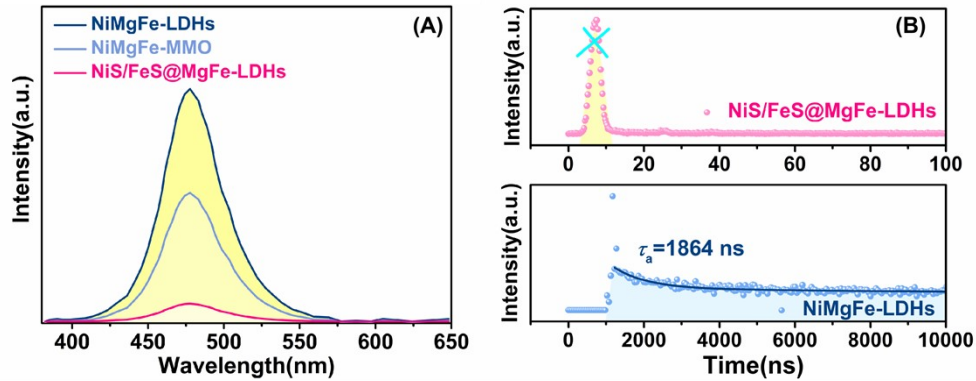

**Fig. S6.** (A) The photoluminescence spectra of all catalysts with 320 nm excitation. (B) TRPL spectra of NiMgFe-LDHs and IIBH NiS/FeS@MgFe-LDHs with 343 nm excitation and 470 nm emission.

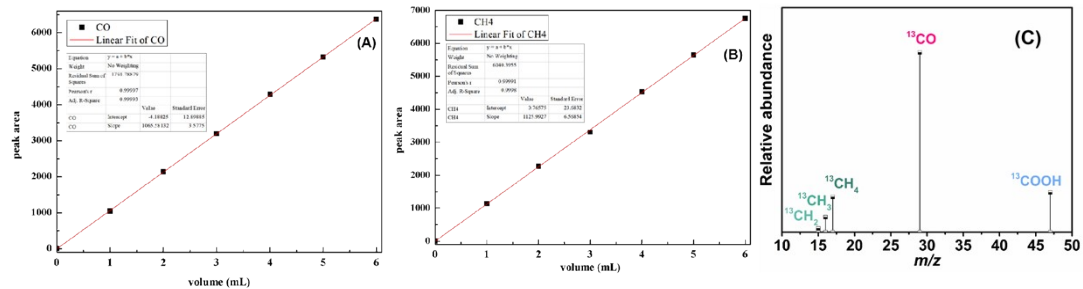

**Fig. S7.** GC standard curve for the quantitative determination of pure (A) CO and (B) CH<sub>4</sub> by external standard

method. (C) The isotope experiments of photocatalytic CO<sub>2</sub> methanation with <sup>13</sup>CO<sub>2</sub>.

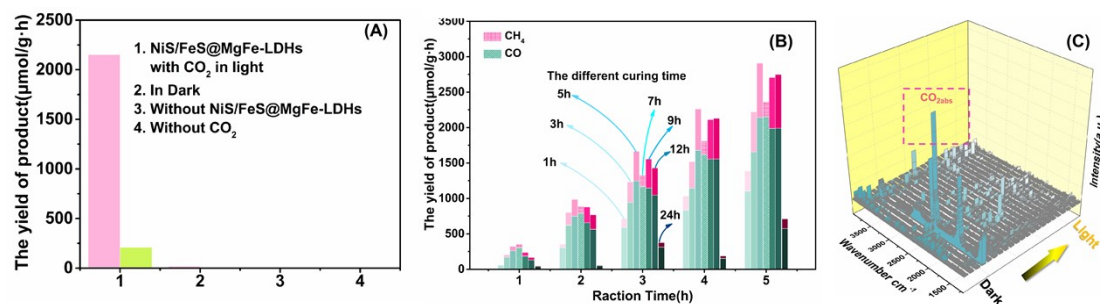

**Fig. S8.** (A) Photocatalytic blank and control experiments. (B) Photocatalytic experiments with catalysts obtained at different vulcanisation times. (C) The *in-situ* FTIR of the NiMgFe-LDHs.

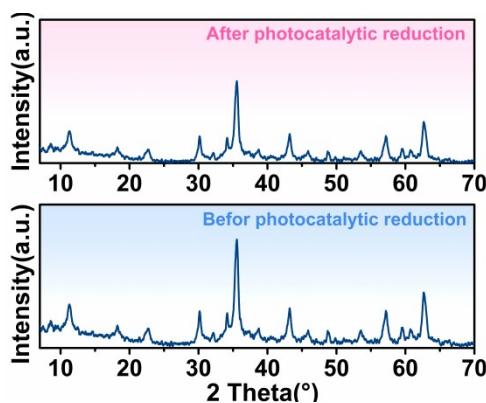

**Fig. S9.** The XRD pattern of the IIBH NiS/FeS@MgFe-LDHs underwent the photocatalytic reduction CO<sub>2</sub>.

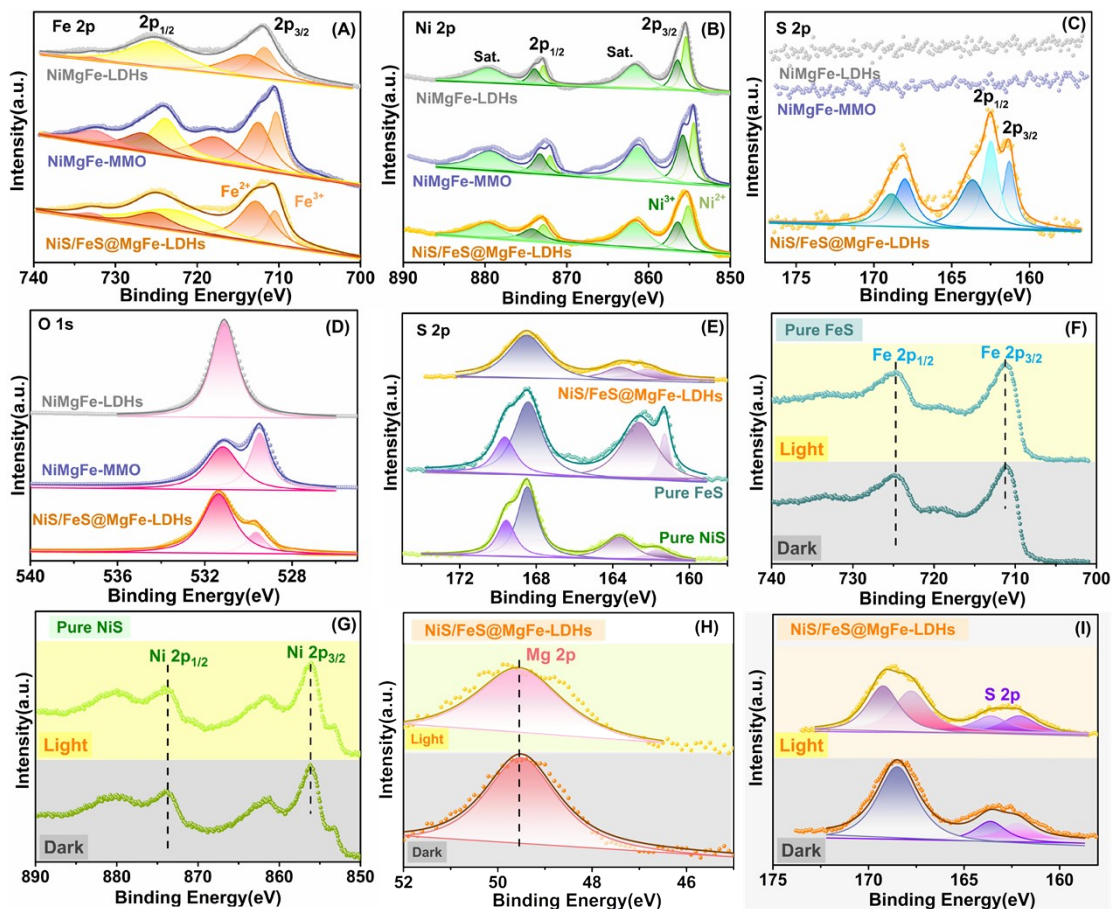



**Fig. S10.** The XPS spectra of NiMgFe-LDHs, NiMgFe-MMO, and of NiS/FeS@MgFe-LDHs (A) Fe 2p; (B) Ni 2p; (C) S 2p; (D) O 1s. (E) S 2p of NiS/FeS@MgFe-LDHs, FeS and NiS. The ISI-XPS of (F) FeS; (G) NiS; (H) Mg 1s of NiS/FeS@MgFe-LDHs; (I) S 2p of NiS/FeS@MgFe-LDHs.

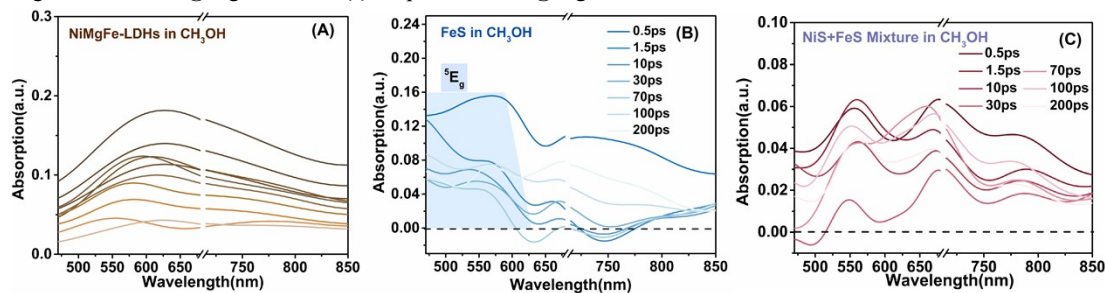

**Fig. S11.** The TAS spectra of (A) NiMgFe-LDHs; (B) FeS; (C) NiS+FeS mixture in CH<sub>3</sub>OH at 350nm excitation.

### Reference:

1. B. Ravel and M. Newville, *Journal of Synchrotron Radiation*, 2005, **12**, 537-541.
2. P. Eisenberger and B. M. Kincaid, *Science*, 1978, **200**, 1441-1447.
3. H. Kumagai, Y. Tamaki and O. Ishitani, *Accounts of Chemical Research*, 2022, **55**, 978-990.
4. J.-E. Lee, A. Yamaguchi, H. Ooka, T. Kazami, M. Miyauchi, N. Kitadai and R. Nakamura, *Chemical Communications*, 2021, **57**, 3267-3270.
5. L. Zhang, M. Can, S. W. Ragsdale and F. A. Armstrong, *ACS Catalysis*, 2018, **8**, 2789-2795.
6. Q. He, B. Wu, Y. Hu, W. Huang and Y. Li, *Science China Chemistry*, 2020, **63**, 1716-1720.
7. H. Dai, R. Cui, C. Chen, J. Song, J. Li, L. Dong, C. Yu, W. Jiang and Y. Zhou, *Chemistry – A European Journal*, 2023, **29**, e202300879.
8. D. W. White, D. Eस्कilsen, S. K. Lee, S. W. Ragsdale and R. B. Dyer, *The Journal of Physical Chemistry Letters*, 2022, **13**, 5553-5556.
9. T. W. Woolerton, S. Sheard, E. Reisner, E. Pierce, S. W. Ragsdale and F. A. Armstrong, *Journal of the American Chemical Society*, 2010, **132**, 2132-2133.
